# Supplementary material
Source: publisher site journal article supplement (https://www.dovepress.com/article/489087)
Supplement: Supplementary file 1 [file get_supplementary_file.php]

**Supplementary Material**

**
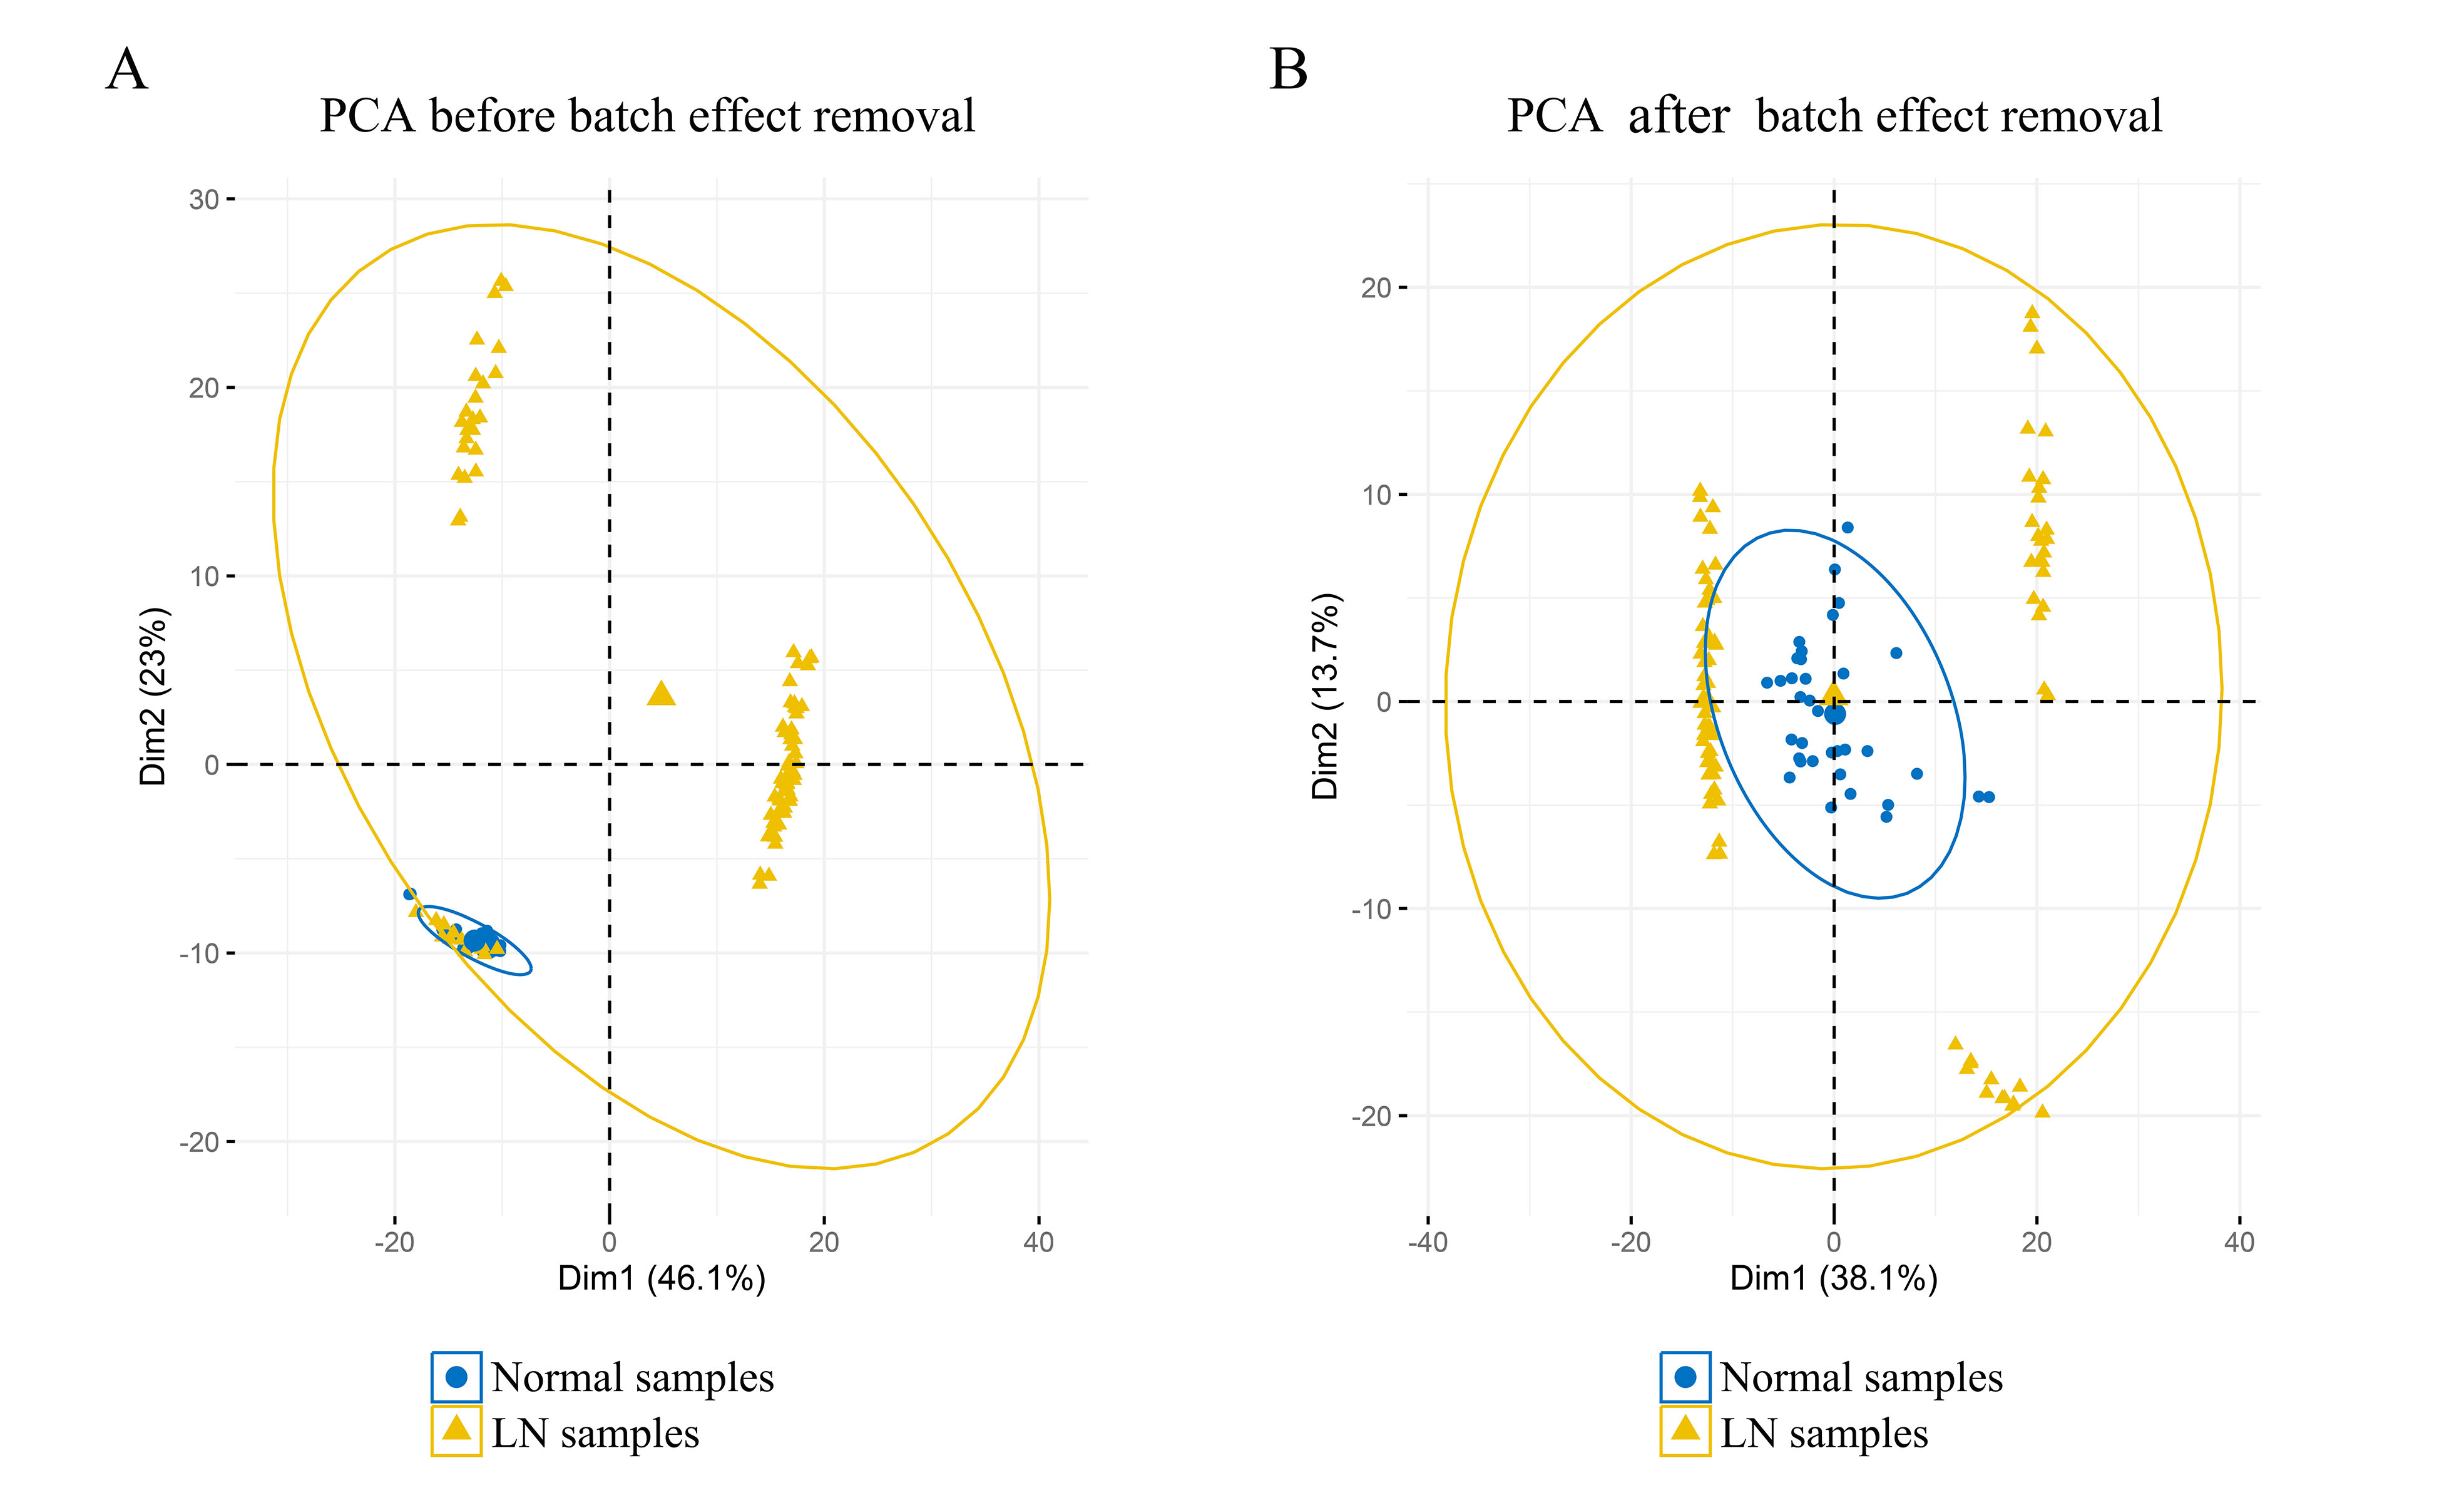
**

**Figure1.** The principal component analysis (PCA) showing the distribution of samples in patients with lupus nephritis and normal controls. (A) PCA before batch effect removal. (B) PCA after batch effect removal.

**
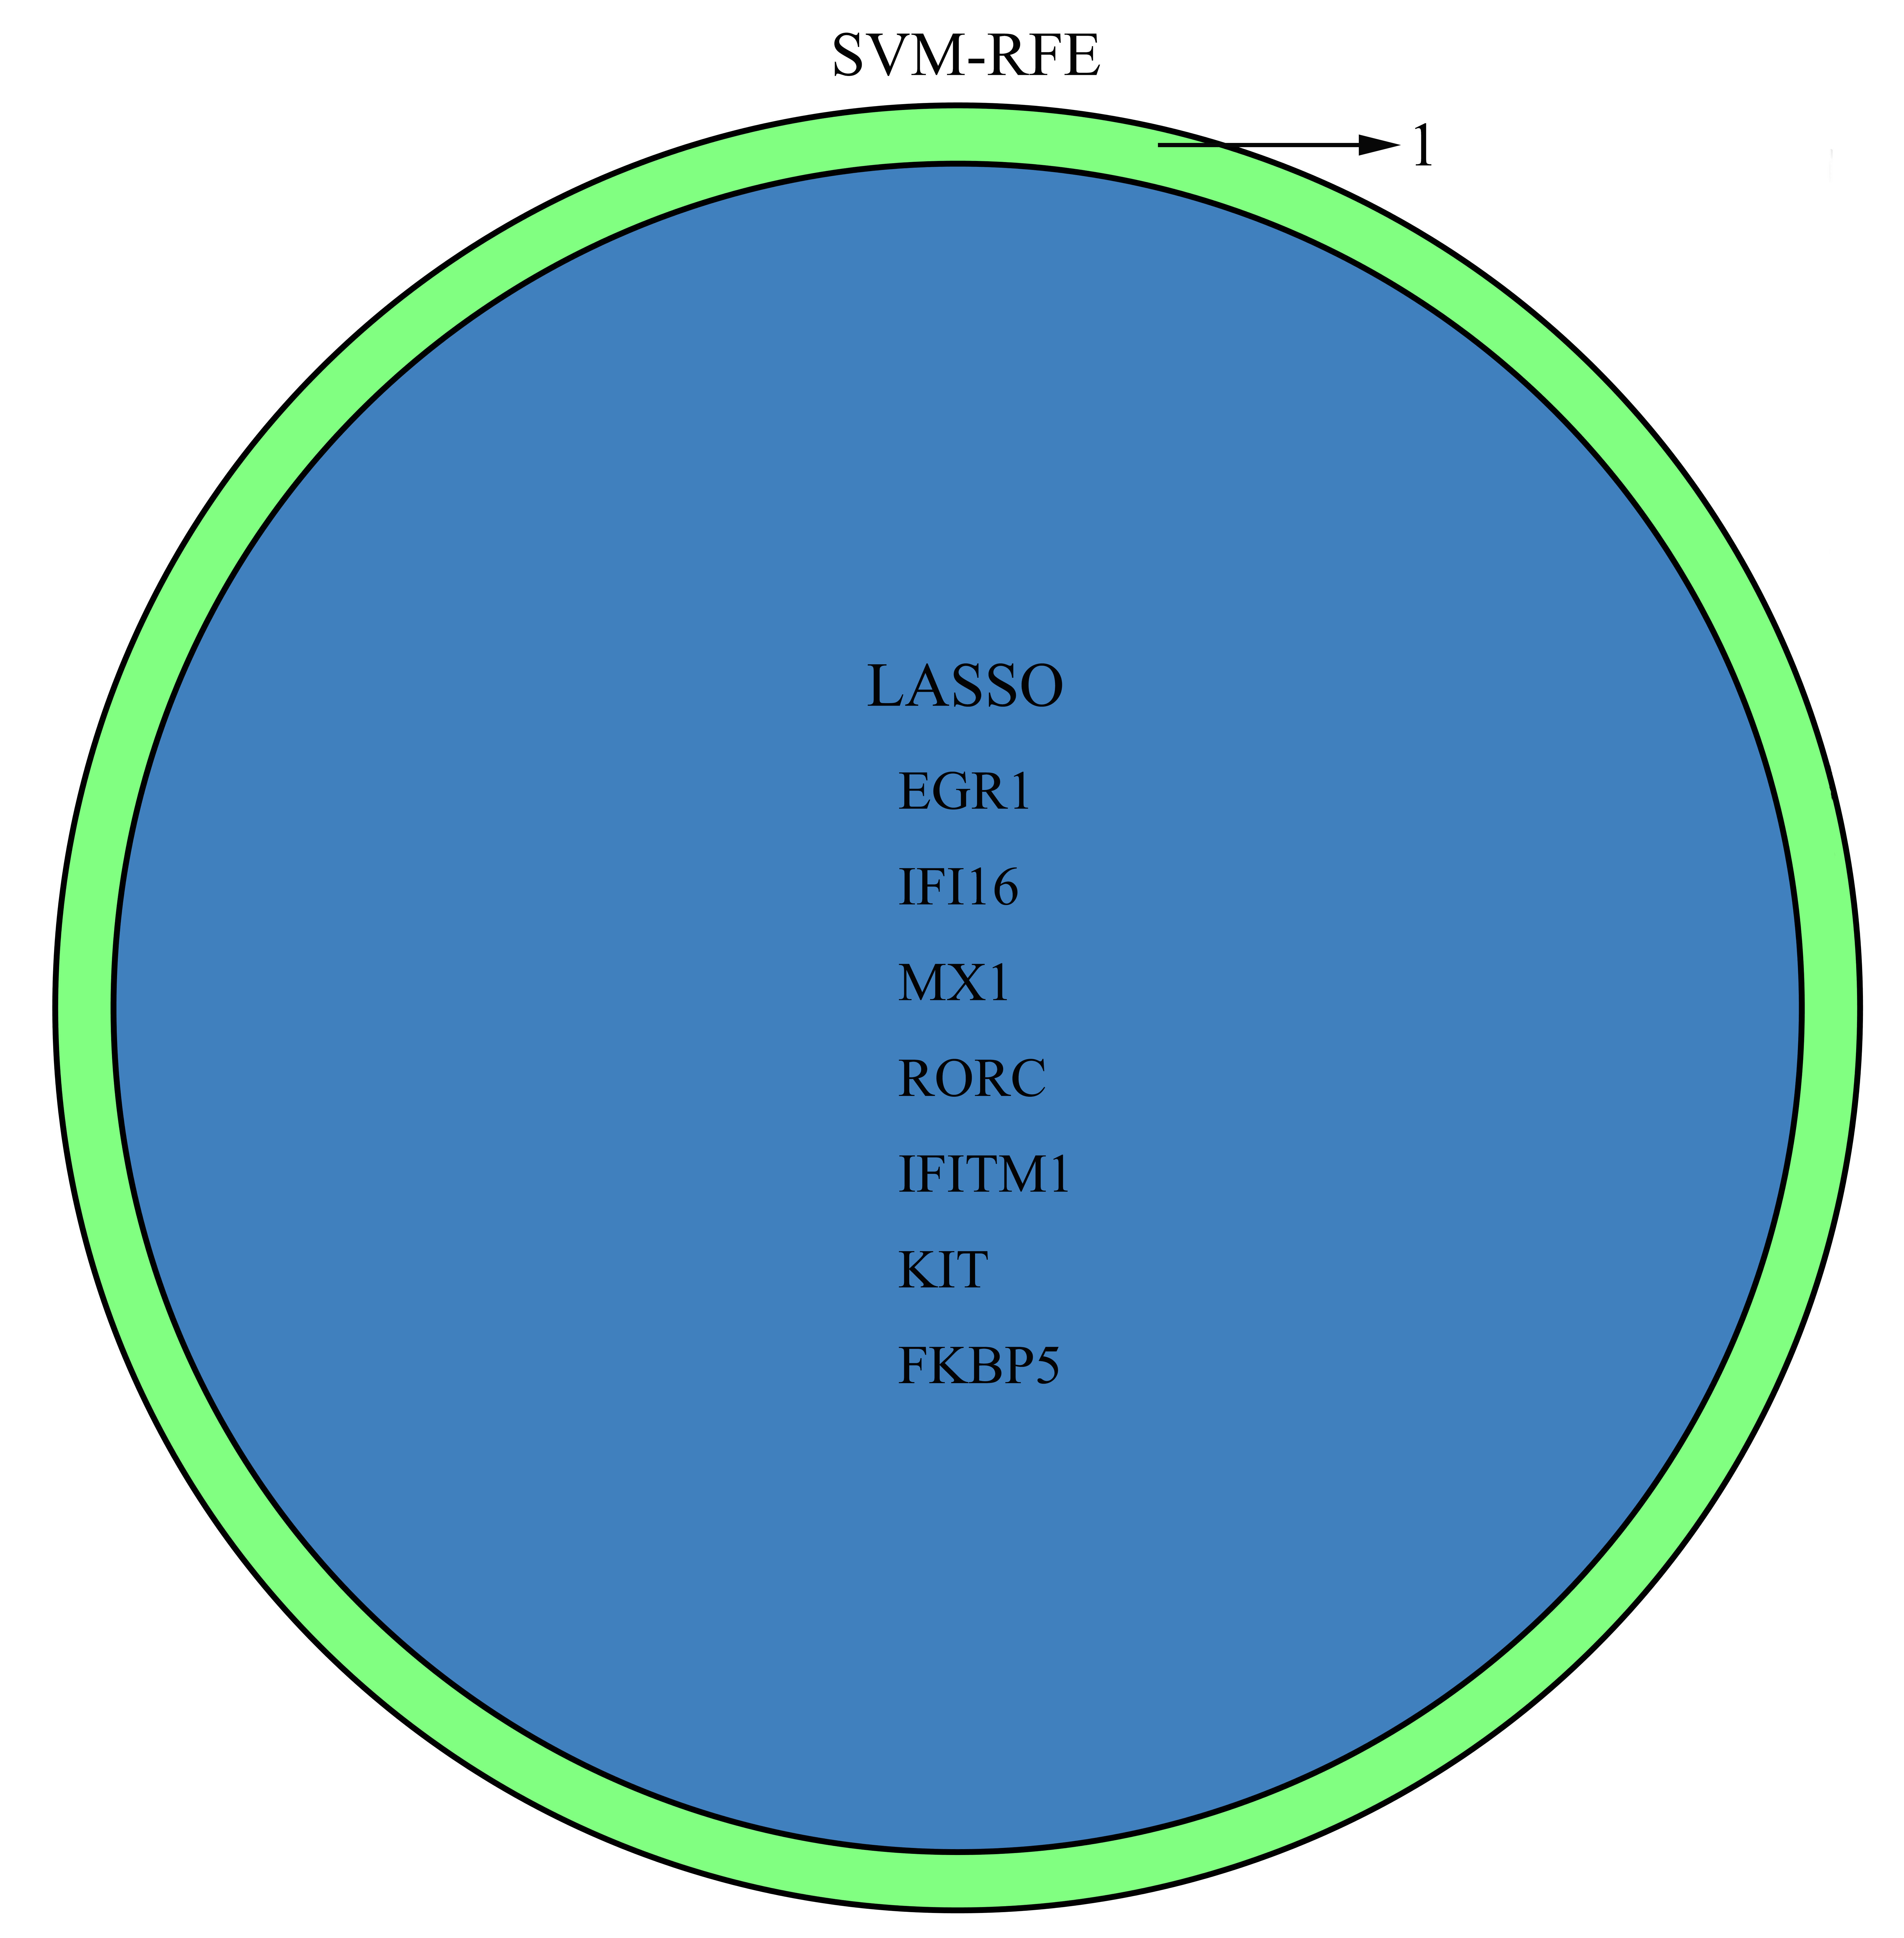
**

**Figure2.** Venn diagram of the intersection of candidate diagnostic genes screened through LASSO and SVM-RFE.

**
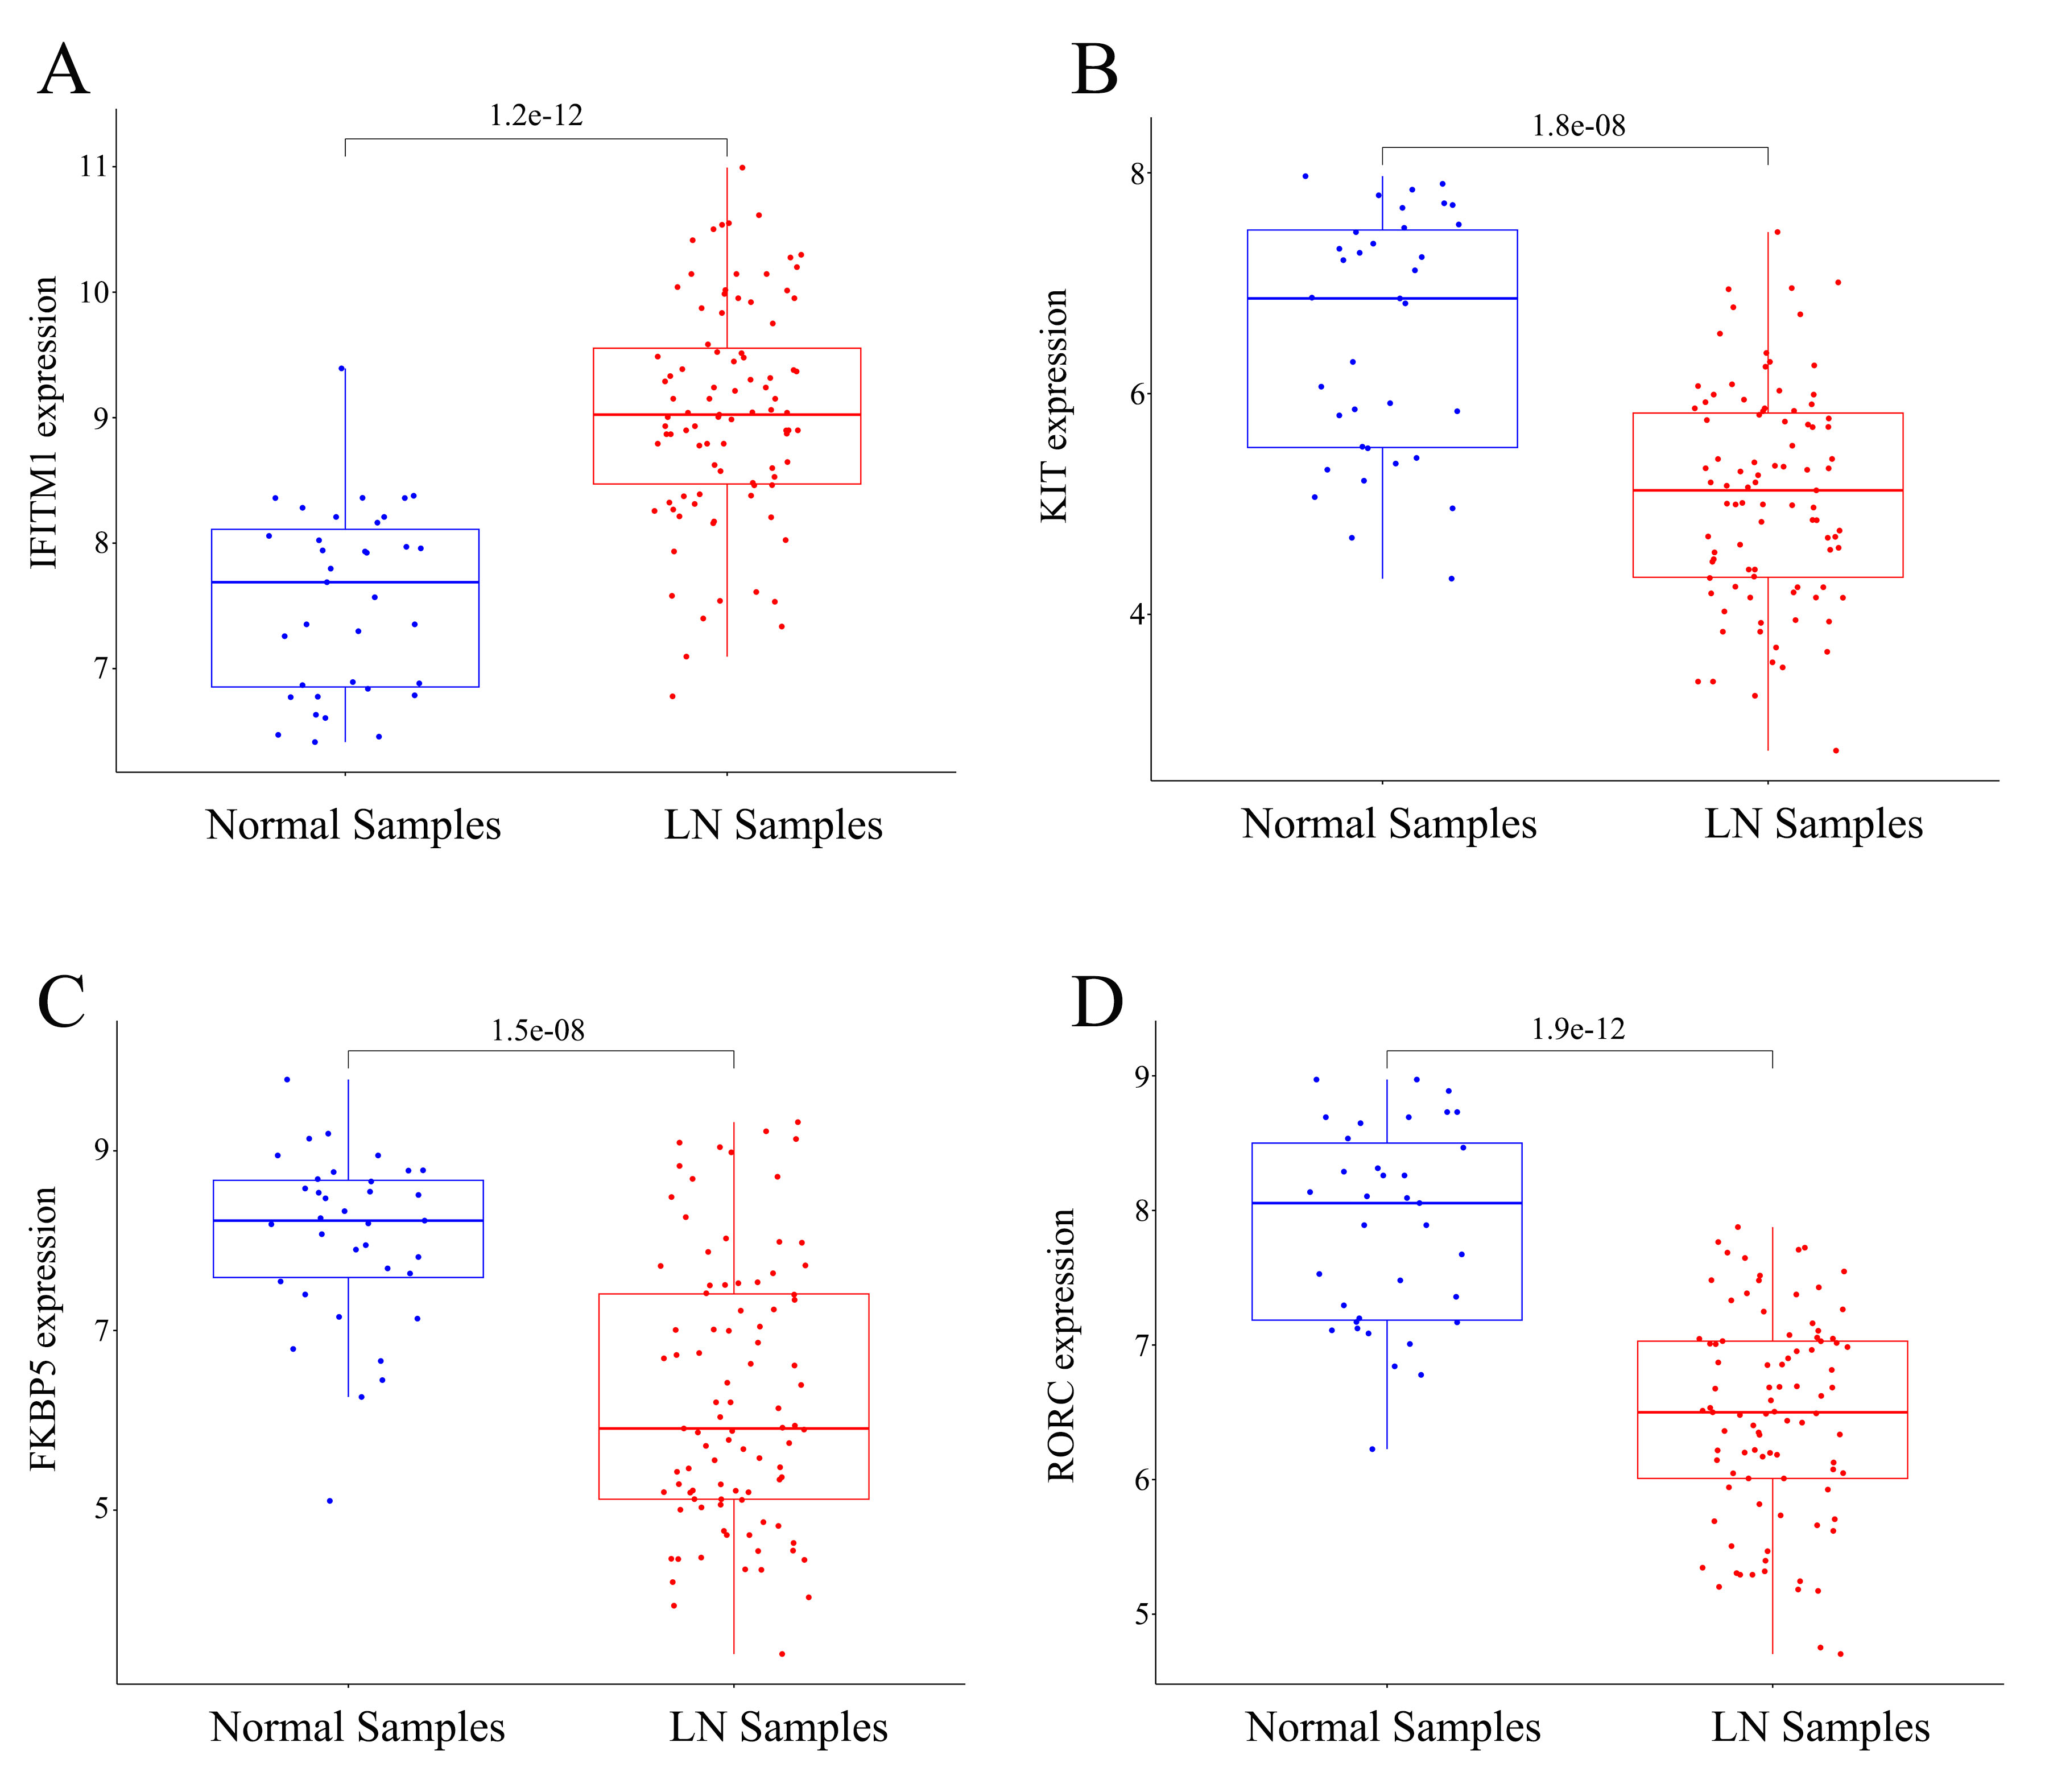
**

**Figure3.** The feature genes were differentially expressed in healthy and LN specimens.(A) *IFITM1* expression was distinctly upregulated in LN samples.(B) *KIT* expression was distinctly downregulated in LN samples.(C) *FKBP5* expression was distinctly downregulated in LN samples. (D) *RORC* expression were distinctly downregulated in LN samples.

**
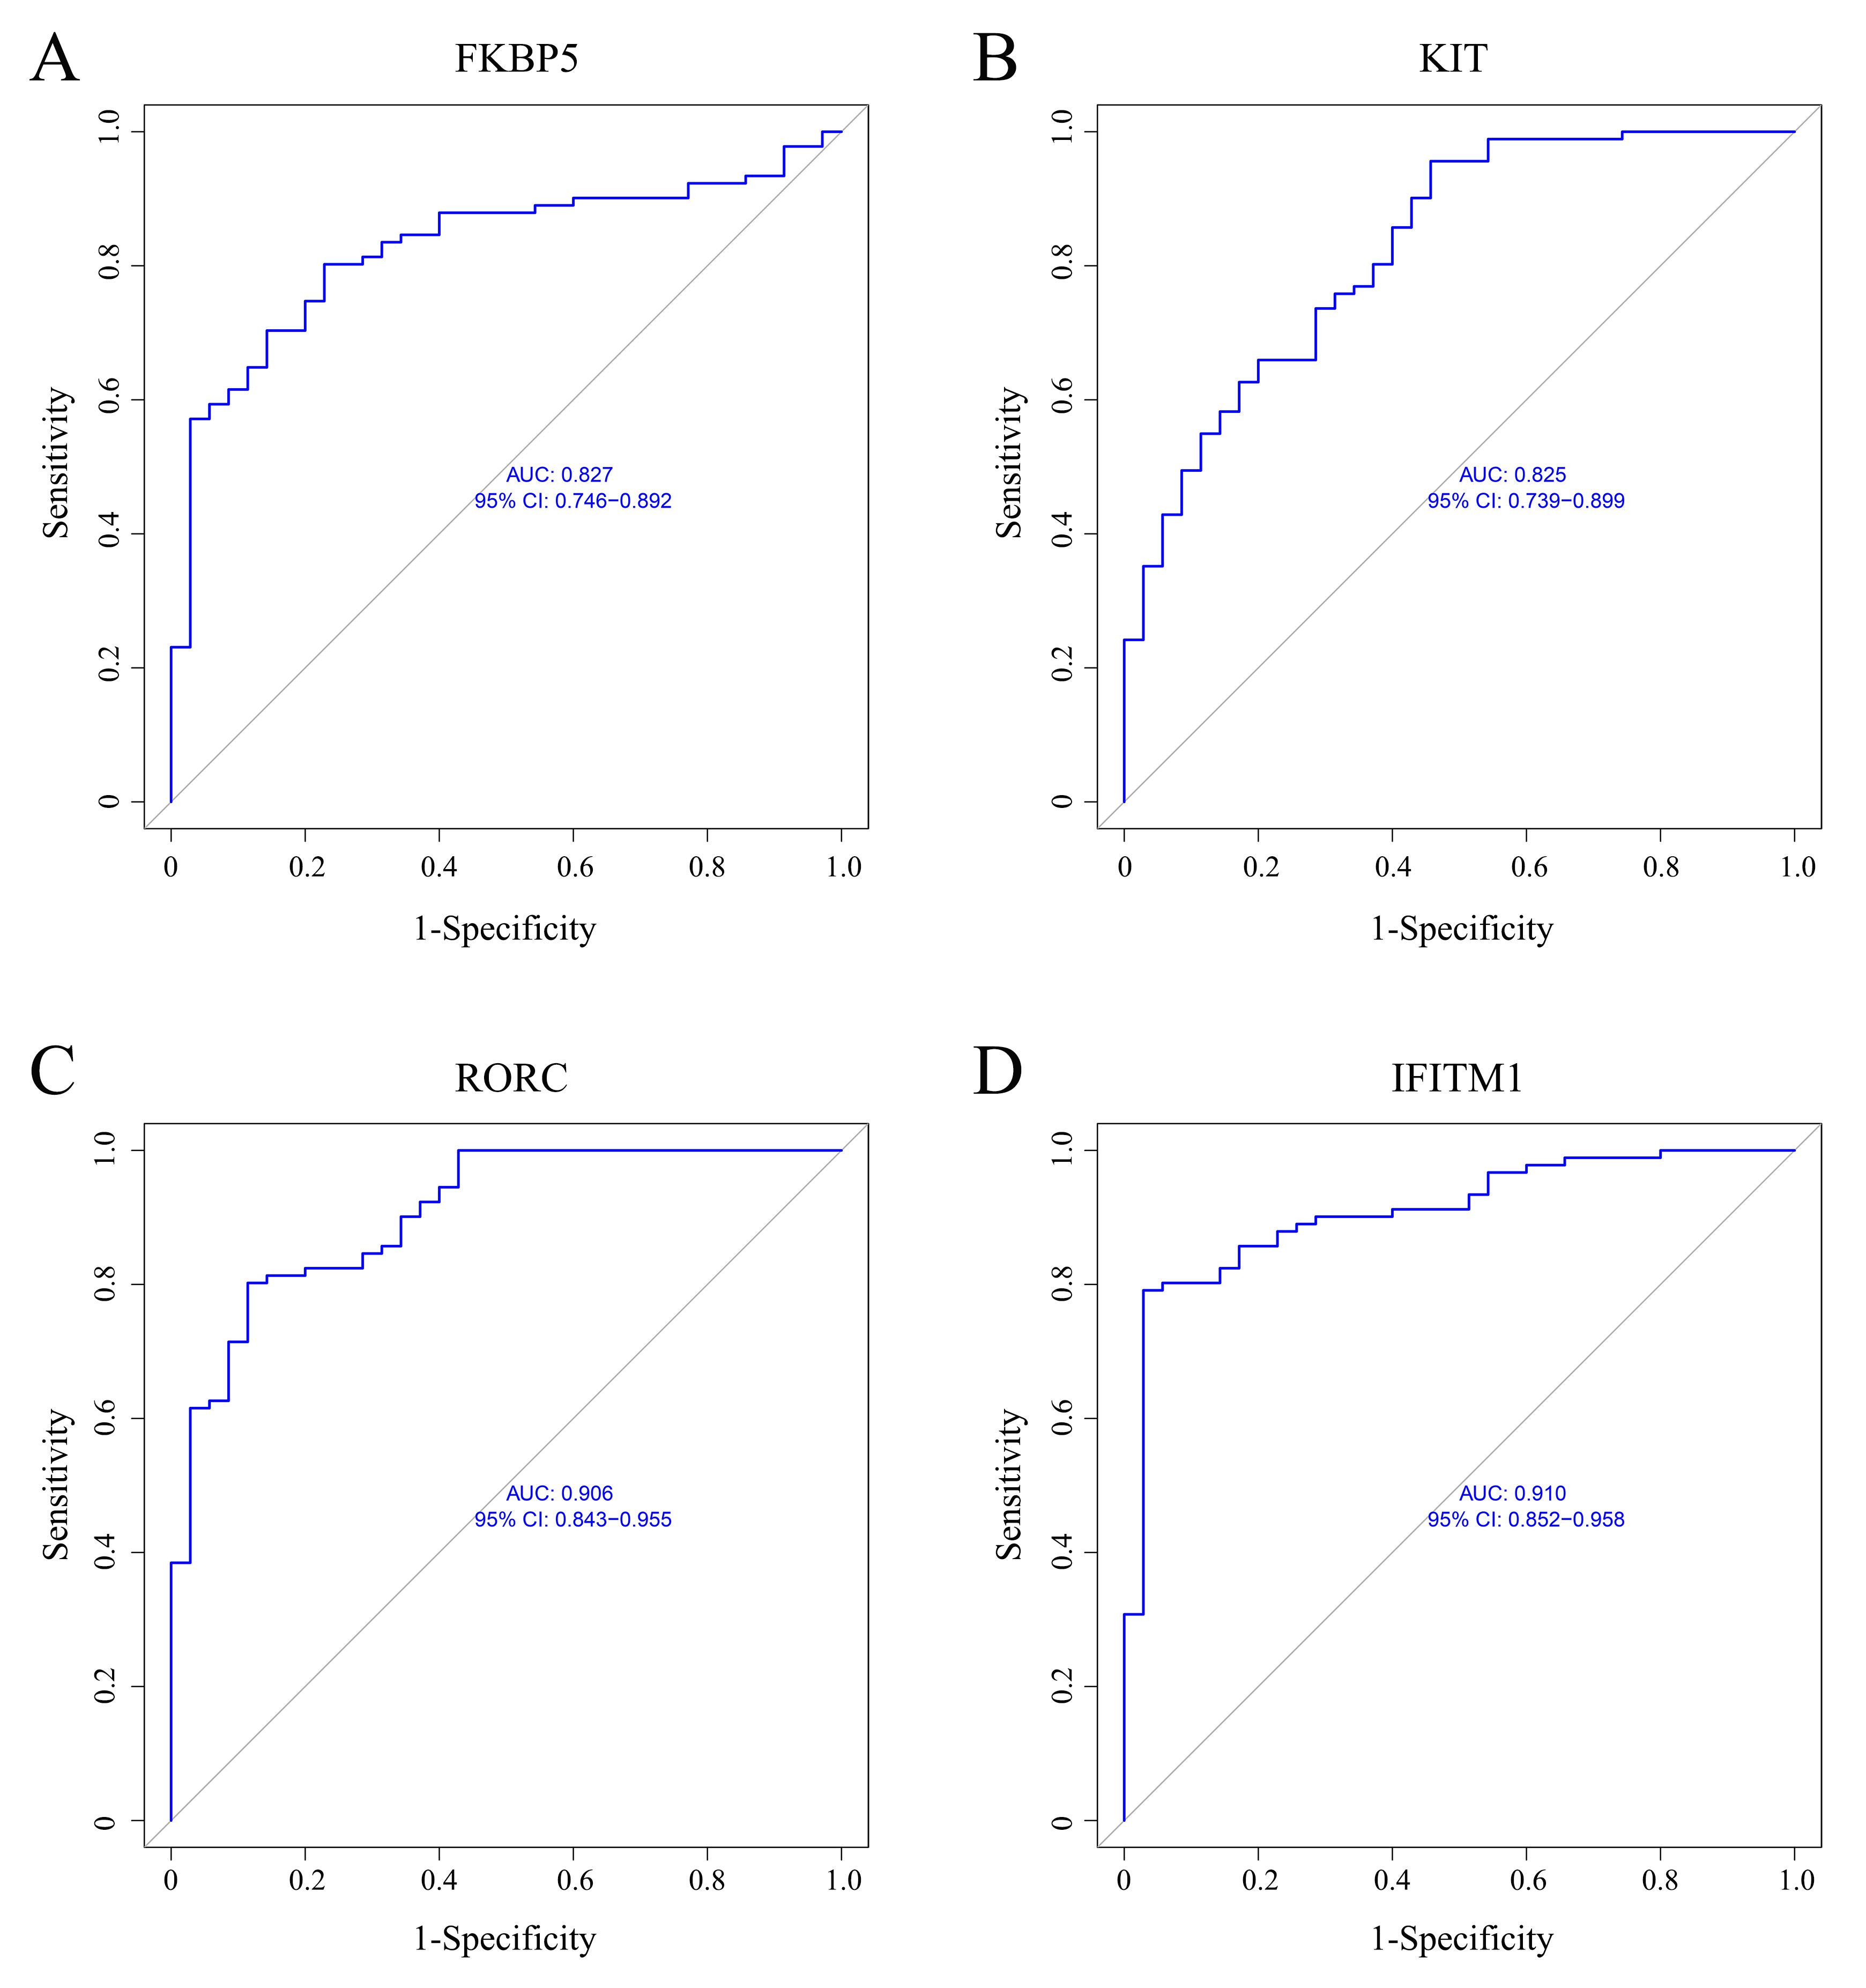
**

**Figure4.** The receiver operating characteristic (ROC) curve of the diagnostic values of the feature genes. (A) ROC assays for *FKBP5* in LN.(B) ROC assays for *KIT* in LN.(C)ROC assays for *RORC* in LN. (D) ROC assays for *IFITM1* in LN.
